# Supplementary material for: Diagnostic Accuracy of Methods for Detection of Antibodies against Type I Interferons in Patients with Endocrine Disorders
Source: MDPI journal article supplement (doi:10.3390/jpm12121948), 2022-11-24
Supplement: s1 [file s1]

**Table S3.** Age and gender in groups of participants

| Group | Patients |                |                      |       |       |
|-------|----------|----------------|----------------------|-------|-------|
|       | n        | Age<br>(years) | Gender (Femail/Male) |       |       |
|       |          |                | n                    | %     | ratio |
| 1     | 18       | 18-49          | 13/5                 | 72/28 | 2,6:1 |
| 2     | 89       | 19-72          | 75/14                | 84/16 | 5,4:1 |
| 3     | 71       | 18-88          | 51/20                | 72/28 | 2,6:1 |
| 4     | 28       | 18-60          | 22/6                 | 79/21 | 3,6:1 |
