# Supplementary material for: Diagnostic Accuracy of Methods for Detection of Antibodies against Type I Interferons in Patients with Endocrine Disorders
Source: MDPI journal article supplement (doi:10.3390/jpm12121948), 2022-11-24
Supplement: s1 [file s1]

**Table S2.** Criteria for inclusion and exclusion of patients in the study

|                                                                                                                                                                                                                                                                                                                                                                                                                                                                                                                                                                                         |
|-----------------------------------------------------------------------------------------------------------------------------------------------------------------------------------------------------------------------------------------------------------------------------------------------------------------------------------------------------------------------------------------------------------------------------------------------------------------------------------------------------------------------------------------------------------------------------------------|
| <b>Common criteria for inclusion in groups 1-4:</b>                                                                                                                                                                                                                                                                                                                                                                                                                                                                                                                                     |
| Male and female.<br>Age: 18 and older.<br>Signed informed consent, approved by the local ethics committee of the Endocrinology Research Centre, Ministry of Health of Russia, Moscow, Russia (protocol .17 and date of approval 27 September 2017).                                                                                                                                                                                                                                                                                                                                     |
| <b>Additional criteria for inclusion in group 1:</b>                                                                                                                                                                                                                                                                                                                                                                                                                                                                                                                                    |
| At least two major components of APS-1 and/or mutation in the <i>AIRE</i> gene.                                                                                                                                                                                                                                                                                                                                                                                                                                                                                                         |
| <b>Additional criteria for inclusion in group 2:</b>                                                                                                                                                                                                                                                                                                                                                                                                                                                                                                                                    |
| Autoimmune thyroiditis: Elevated levels of antibodies to TPO, TG and/or TSHR; signs of autoimmune lesion on thyroid ultrasound and/or medical history (in the case of Graves' disease).                                                                                                                                                                                                                                                                                                                                                                                                 |
| Autoimmune diabetes mellitus: the onset of the disease from a young age, and/or an increased level of antibodies to GAD-65, ZnT8, IA2, IAA and/or ICA.                                                                                                                                                                                                                                                                                                                                                                                                                                  |
| Hypergonadotropic hypogonadism of autoimmune genesis: the acquired form is excluded.                                                                                                                                                                                                                                                                                                                                                                                                                                                                                                    |
| Primary autoimmune adrenal insufficiency: the acquired form is excluded.                                                                                                                                                                                                                                                                                                                                                                                                                                                                                                                |
| <b>Additional criteria for inclusion in group 3:</b>                                                                                                                                                                                                                                                                                                                                                                                                                                                                                                                                    |
| No criteria for inclusion in groups 1-3 (according to the survey).                                                                                                                                                                                                                                                                                                                                                                                                                                                                                                                      |
| Non-autoimmune thyroid disease: normal level of AT to TPO, TG, and/or TSHR; no signs of autoimmune damage according to ultrasound of the thyroid gland; intact thyroid gland; lack of concomitant autoimmune diseases.                                                                                                                                                                                                                                                                                                                                                                  |
| Non-autoimmune diabetes mellitus: normal levels of antibodies to GAD-65, ZnT8, IA2, IAA, and/or ICA; intact pancreas; lack of concomitant autoimmune diseases.                                                                                                                                                                                                                                                                                                                                                                                                                          |
| Non-autoimmune hypergonadotropic hypogonadism: intact ovaries, testes; lack of concomitant autoimmune diseases.                                                                                                                                                                                                                                                                                                                                                                                                                                                                         |
| Non-autoimmune adrenal insufficiency: intact adrenal glands, normal level of AT to 21-OH; lack of concomitant autoimmune diseases.                                                                                                                                                                                                                                                                                                                                                                                                                                                      |
| Non-autoimmune parathyroid disease: absence of concomitant autoimmune diseases and intact parathyroid gland.                                                                                                                                                                                                                                                                                                                                                                                                                                                                            |
| <b>Additional criteria for inclusion in group 4:</b>                                                                                                                                                                                                                                                                                                                                                                                                                                                                                                                                    |
| Absence of endocrine (autoimmune and non-autoimmune) pathology (according to the survey).                                                                                                                                                                                                                                                                                                                                                                                                                                                                                               |
| <b>Criteria for exclusion (all groups):</b>                                                                                                                                                                                                                                                                                                                                                                                                                                                                                                                                             |
| Pregnancy, lactation.<br>Acute infections.<br>Severe, life-threatening conditions: decompensation of chronic heart failure, chronic kidney disease C3b or more, pulmonary and liver failure, mental illness.<br>Other immune system pathology (including congenital and acquired immunodeficiencies, hypersensitivity reactions).<br>Taking drugs that affect immune system function (interleukins, interferons, immunoglobulins, immunosuppressants, cytostatics) for 6 weeks before inclusion in the study. Vaccinations/revaccinations within a month before inclusion in the study. |
